# Supplementary material for: Inulin prebiotic reinforces host cancer immunosurveillance via ɣδ T cell activation
Source: PubMed Central journal article supplement (PMC9981629; doi:10.3389/fimmu.2023.1104224), 2023-02-17
Supplement: DataSheet_1.pdf [file DataSheet_1.pdf]

# Supplementary Data and Tables

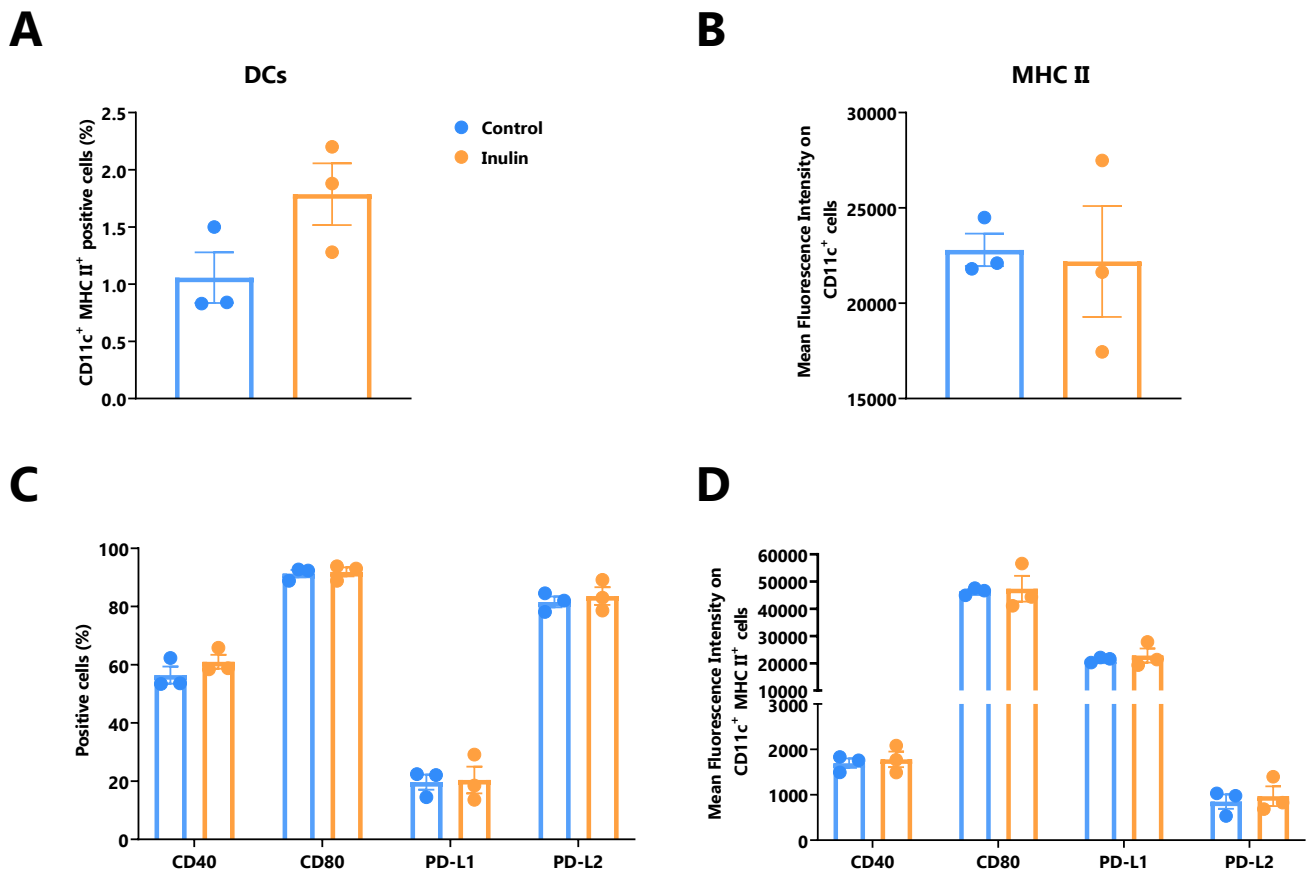

## Supplemental Figure S1: Inulin-enriched regimen leads to higher DC infiltration in B16 OVA tumors.

(A) Frequency of Dendritic Cells (DCs, as defined as CD11c<sup>+</sup>MHCII<sup>+</sup>) among CD45<sup>+</sup> cells in the B16 OVA tumor of mice treated as described in Figure 1A. (C) Frequency and (B-D) MFI of DC activation markers on DCs in the B16 OVA tumor of mice treated as described in Figure 1A. Graphs show the mean  $\pm$  SEM.

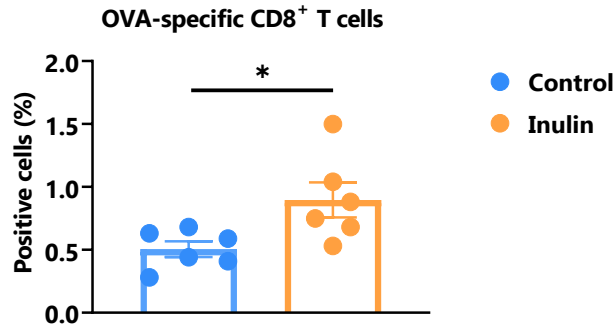

**Supplemental Figure S2: Inulin potentiates antigen-specific CD8<sup>+</sup> T cell response after OVA PolyI:C immunization.**

C57BL/6 mice were fed with a control diet or inulin-enriched diet (7.2% in drinking water) (n=12 mice per group) starting 15 days before s.c. immunization against OVA protein (500µg/mouse) adjuvanted with PolyI:C (50µg/mouse). Frequency of OVA-specific CD8<sup>+</sup> T cells (defined as Dextramer<sup>+</sup> among CD45<sup>+</sup>CD3<sup>+</sup>CD8<sup>+</sup>CD44<sup>+</sup>) in vaccine draining (inguinal) lymph nodes was analyzed 7 days post-immunization. Graph shows the mean ± SEM. \*p < 0.05, by Mann-Whitney test.

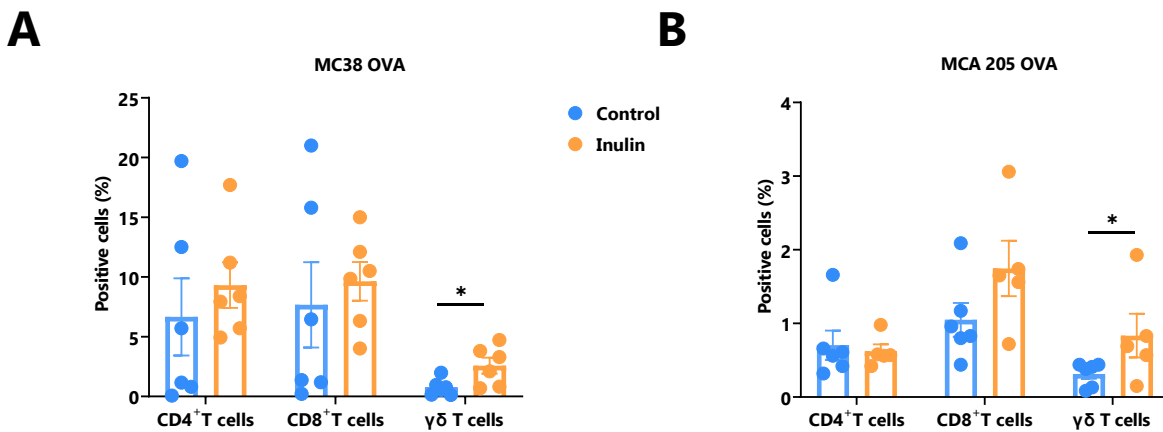

**Supplemental Figure S3: Inulin regimen promotes γδ T cell infiltration in MC38 OVA and MCA 205 OVA tumor models.**

C57BL/6 mice were fed with a control or an inulin-enriched diet (7.2% in drinking water) (n=6 mice per group) starting 15 days before subcutaneous (s.c.) inoculation of 5x10<sup>5</sup> MC38 OVA colorectal cancer cells, or 2x10<sup>5</sup> MCA 205 OVA fibrosarcoma cells (n=6 mice per group). Frequency of (A) MC38 OVA or (B) MCA 205 OVA tumor-infiltrated IFNγ-producing T lymphocytes. Graphs show the mean ± SEM. Statistically significant results are indicated by: \*p < 0.05 by Mann-Whitney tests.

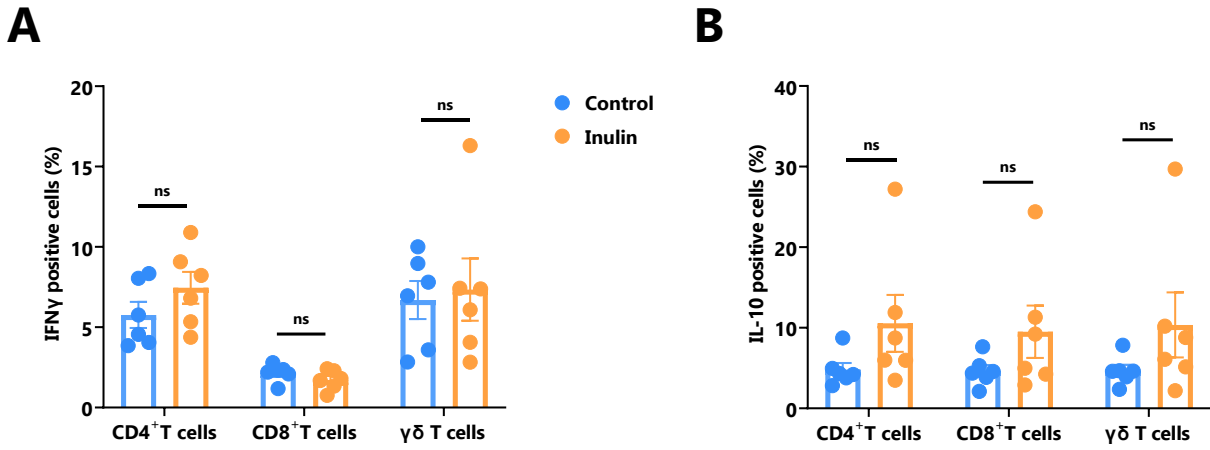

**Supplemental Figure S4: Inulin consumption tends to increase IL-10 production by LPC in the colon.**

C57BL/6 mice were fed with a control diet or inulin-enriched diet (7.2% in drinking water) (n=12 mice per group) for 15 days before the analysis of their gut immunity. Frequency of (A) IFN $\gamma$ -producing or (B) IL-10-producing Lamina Propria T Cells (LPCs). Graphs show the mean  $\pm$  SEM. ns = not-significant, \*p < 0.05 by Mann-Whitney tests.

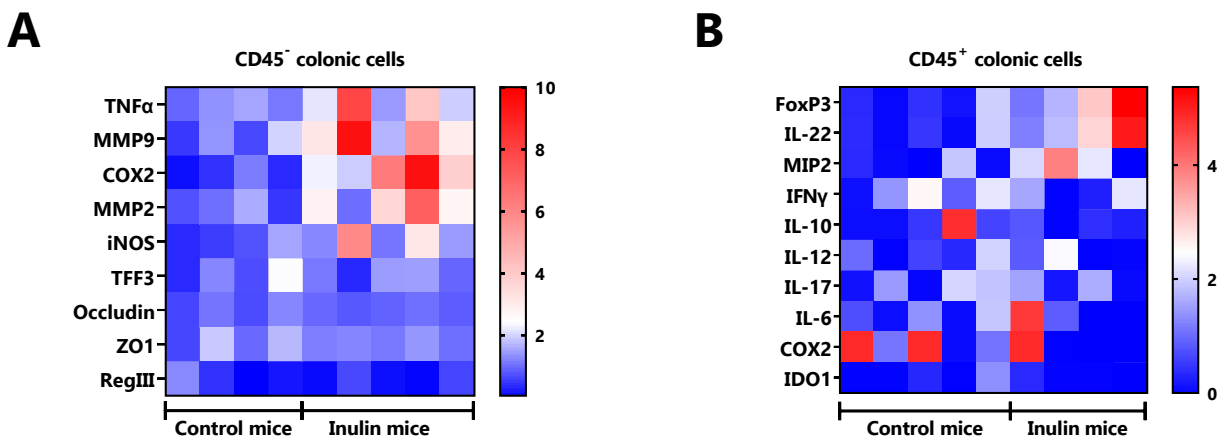

**Supplemental Figure S5: Inulin diet impacts immune and epithelial cell inflammation in the colon.**

qRT-PCR analysis of inflammation, tissue repair and tight junction -related genes in (A) CD45<sup>-</sup> and (B) CD45<sup>+</sup> colon cells sorted as described in (3E). Graphs show the expression levels of all the analysed genes.

**A**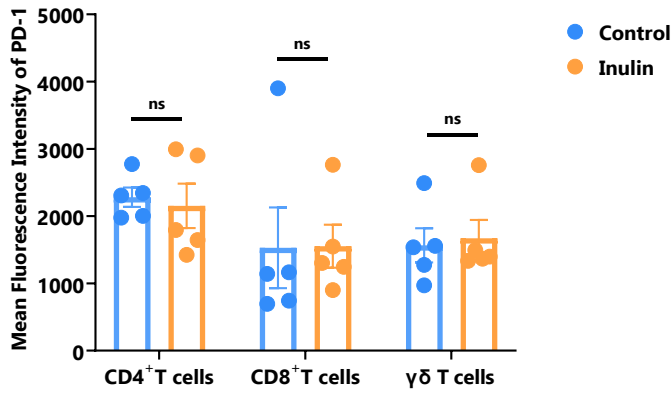**B**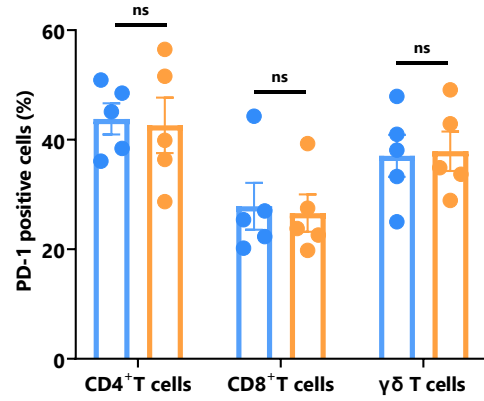

**Supplemental Figure S6: Inulin does not affect PD1 expression by TILs in the B16 OVA tumor.**

(A) Mean Fluorescence Intensity (MFI) of PD1 and (B) frequency of PD1<sup>+</sup> cells among CD4<sup>+</sup>, CD8<sup>+</sup> and γδ T cells in the B16 OVA tumor of mice treated as described in Figure 1A. Graphs show the mean ± SEM. ns = not-significant by Mann-Whitney tests.

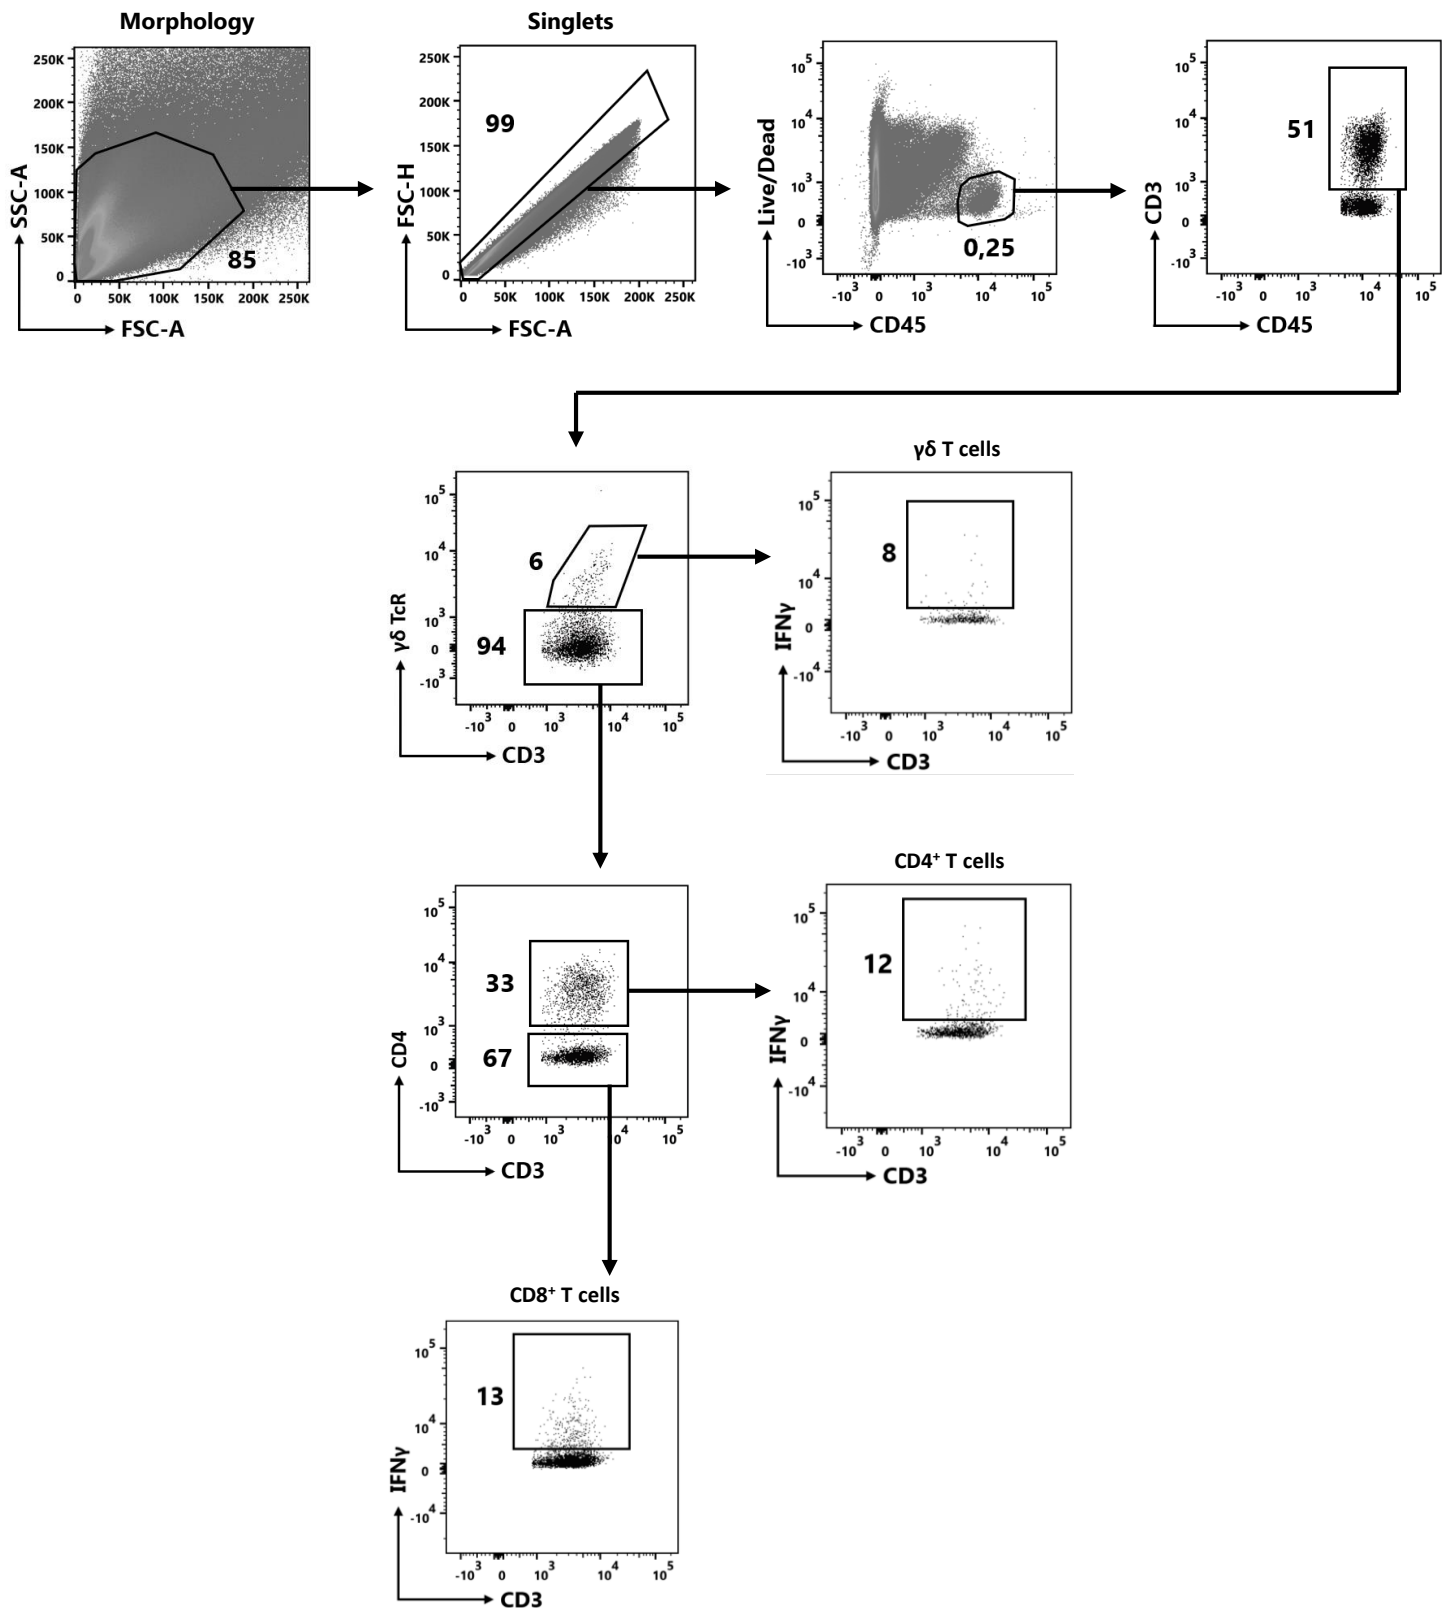

**Supplemental Figure S7: Gating strategy.**

Illustrative dot plots showing the gating strategy allowing the analysis of intracellular IFN $\gamma$  production by TILs. The same gating strategy is used for IELs analysis.

| Percentages (%)         | Control | Inulin | Global |
|-------------------------|---------|--------|--------|
| <b>Firmicutes</b>       | 59,61   | 57,11  | 58,30  |
| <b>Bacteroidota</b>     | 37,87   | 35,87  | 36,83  |
| <b>Desulfobacterota</b> | 1,52    | 1,11   | 1,31   |
| <b>Proteobacteria</b>   | 0,97    | 1,23   | 1,11   |
| <b>Actinobacteriota</b> | 0,03    | 4,67   | 2,46   |

**Supplemental Table S1: Inulin diet alters microbiota composition** Relative abundance of bacterial phyla in %. Means of 10-11 mice / group

| Antibody                             | Source                   | Identifier                                                   |
|--------------------------------------|--------------------------|--------------------------------------------------------------|
| APC/Cy7 anti-mouse CD45              | BD Bioscience            | Cat# 557659, clone 30-F11, RRID:AB_396774                    |
| BV421 anti-mouse PD-1                | BD Bioscience            | Cat# 748268, Clone RMP1-30, RRID:AB_2872696                  |
| BV421 anti-mouse IL-17A              | BD Bioscience            | Cat# 563354, Clone TC11-18H10, RRID:AB_2687547               |
| FITC anti-mouse CD3                  | Biolegend                | Cat# 100204, Clone 17A2, RRID:AB_312661                      |
| PerCP/Cy5.5 anti-mouse CD4           | Biolegend                | Cat# 100434, Clone GK1.5, RRID:AB_893324                     |
| PE anti-mouse CCR9                   | Biolegend                | Cat# 129708, Clone 9B1, RRID:AB_2073249                      |
| FITC anti-mouse CD11c                | Biolegend                | Cat# 117306, Clone N418, RRID:AB_313775                      |
| PerCP/Cy5.5 anti-mouse CD8           | Biolegend                | Cat# 100734, Clone 53-6.7, RRID:AB_2075238                   |
| BV421 anti-mouse PD-L2               | Biolegend                | Cat# 329616, Clone 24F.10C12, RRID:AB_2716087                |
| APC anti-mouse PD-L1                 | Biolegend                | Cat# 124312, Clone 10F.9G2, RRID:AB_10612741                 |
| PerCP/Cy5.5 anti-mouse MHC Class II  | Biolegend                | Cat# 107626, Clone M5/114.15.2, RRID:AB_2191071              |
| PE/Cy7 anti-mouse CD80               | Biolegend                | Cat# 104734, Clone 16-10A1, RRID:AB_2563113                  |
| PE anti-mouse CD40                   | Biolegend                | Cat# 124610, Clone 3/23, RRID:AB_1134075                     |
| APC anti-mouse IFN $\gamma$          | Biolegend                | Cat# 505810, Clone XMG1.2 RRID:AB_315404                     |
| BV421 anti-mouse CD44                | Biolegend                | Cat# 103040, Clone IM7, RRID:AB_2616903                      |
| PE/Cy7 anti-mouse $\gamma\delta$ TcR | eBioscience              | Cat# 25-5711-82, Clone eBioGL3 (GL-3, GL-3), RRID:AB_2573464 |
| PE anti-mouse IL-10                  | Thermo Fisher Scientific | Cat# 12-7101-82, Clone JES5-16E3, RRID:AB_466176             |

**Supplemental Table S2: Antibodies used in flow cytometry.**

| Primer   | Sequence (5' → 3')       | Primer      | Sequence (5' → 3')    |
|----------|--------------------------|-------------|-----------------------|
| GAPDH FW | GGTGAAGGTCGGTGTGAACG     | MMP-9 FW    | TGGGGGCAACTCGGC       |
| GAPDH RV | CTCGCTCCTGGAAGATGGTG     | MMP-9 RV    | GGAATGATCTAAGCCCAG    |
| β2M FW   | GTATACTCACGCCACCCACC     | iNOS FW     | GTTGAAGACTGAGACTCTGG  |
| β2M RV   | TCCCGTTCTTCAGCATTTGG     | iNOS RV     | ACTAGGCTACTCCGTGGA    |
| IL-1β FW | TGATGAGAATGACCTCTTCT     | Cox-2 FW    | GGGTTGCTGGGGGAAGAAATG |
| IL-1β RV | CTTCTTCAAAGATGAAGGAAA    | Cox-2 RV    | GGTGGCTGTTTTGGTAGGCTG |
| IL-6 FW  | TAGTCCTTCCTACCCCAATTTCC  | TFF-3 FW    | CCTGGTTGCTGGGTCTCTG   |
| IL-6 RV  | TTGGTCCTTAGCCACTCCTTCC   | TFF-3 RV    | GCCACGGTTGTACTACTGCTC |
| IL-10 FW | TCCTTAATGCAGGACTTTAAGGG  | Occludin FW | ACGGACCCTGACCACTATGA  |
| IL-10 RV | GGTCTTGGAGCTTATTAATAAT   | Occludin RV | TCAGCAGCAGCCATGTACTC  |
| IL-12 FW | CCTGGGTGAGCCGACAGAAGC    | ZO-1 FW     | GGGGCCTACACTGATCAAGA  |
| IL-12 RV | CCACTCCTGGAACCTAAGCAC    | ZO-1 RV     | TGGAGATGAGGCTTCTGCTT  |
| IL-17 FW | GCTCCAGAAGGCCCTCAGACTACC | FoxP3 FW    | CCTATGGCTCCTTCCTTGGC  |
| IL-17 RV | CTTCCCTCCGCATTGACACAGC   | FoxP3 RV    | CCTGGGTGCAGTCTTCCAG   |
| TNF-α FW | AACTAGTGGTGCCAGCCGAT     | RegIIly FW  | TGGAGGTGGATGGGAATGGA  |
| TNF-α RV | CTTCACAGAGCAATGACTCC     | RegIIly RV  | GCCACAGAAAGCACGGTCTA  |
| IFNγ FW  | GAAGTGGCAAAAAGGATGGTGA   | IL-22 FW    | GTGCTCAACTTCACCCTGGA  |
| IFNγ RV  | TGTGGGTTGTTGACCTCAAAC    | IL-22 RV    | GGCTGGAACCTGTCTGACTG  |
| MIP-2 FW | TCAATGCCTGAAGACCCTGC     | IDO1 FW     | TGGGACATTCTTCAGTGGC   |
| MIP-2 RV | CGTCACACTCAAGCTCTGGA     | IDO1 RV     | TCTCGAAGCTGCCCGTTCT   |

**Supplemental Table S3: Sequence-specific primers used in qRT-PCR.** FW = Forward sequence; RV = Reverse sequence.
